# Supplementary material for: ESIPT-capable Eu3+-metallopolymer with colour-tunable emission for selective visual sensing of Zn2+ ion
Source: Royal Society of Chemistry journal article supplement (doi:10.1039/d1tc04532f), 2021-12-22
Supplement: d1tc04532f1.pdf [file d1tc04532f1.pdf]

Electronic Supporting Information Available

# ESIPT-capable $\text{Eu}^{3+}$ -metallopolymer with colour-tunable emission for selective visual sensing of $\text{Zn}^{2+}$ ion

Weixu Feng,<sup>\*ab‡</sup> Guorui Fu,<sup>c‡</sup> Yujuan Huang,<sup>b</sup> Yan Zhao,<sup>b</sup> Hongxia Yan<sup>\*b</sup> and Xingqiang Lü<sup>\*c</sup>

| Contents                                                                                                                                                           | Page |
|--------------------------------------------------------------------------------------------------------------------------------------------------------------------|------|
| Materials and methods-----                                                                                                                                         | S2   |
| Synthesis of 1,3-bis(4,4,4-trifluoro-1,3-dioxobutyl)phenyl-----                                                                                                    | S5   |
| Synthesis of 2-(pyridin-2-yl)-5-(4-vinylphenyl)pyridine-----                                                                                                       | S6   |
| Synthesis of divinyl-functionalized complex monomers-----                                                                                                          | S6   |
| Scheme S1. Synthesis procedure for $[\text{Ln}_2(\text{BTP})_3(4\text{-VP-BPY})_2]$ -----                                                                          | S8   |
| Fig. S1. $^1\text{H}$ NMR spectra of <b>4-VP-PHI</b> , $\text{La}(\text{BTP})_3(4\text{-VP-BPY})_2$ and $\text{Poly}[(4\text{-VP-PHI})\text{-co-La-co-MMA}]$ ----- | S8   |
| Fig. S2. Mass spectrum of $\text{Ln}(\text{BTP})_3(4\text{-VP-BPY})_2$ -----                                                                                       | S8   |
| Fig. S3. UV-visible absorption spectra and Photophysical spectra of monomers-----                                                                                  | S9   |
| Fig. S4. High resolution XPS patterns of $\text{Poly}[(4\text{-VP-PHI})\text{-co-Eu-co-MMA}]$ -----                                                                | S9   |
| Fig. S5. TGA curve of $\text{Poly}[(4\text{-VP-PHI})\text{-co-Eu-co-MMA}]$ -----                                                                                   | S9   |
| Fig. S6. spectra of $\text{Poly}[(4\text{-VP-PHI})\text{-co-Gd-co-MMA}]$ with or without $\text{Zn}^{2+}$ at rt or 77K-----                                        | S10  |
| Fig. S7. UV-vis spectra of <b>4-VP-PHI</b> with different metal ions and $\text{Zn}^{2+}$ titration-----                                                           | S10  |
| Fig. S8. $^1\text{H}$ NMR spectra of pure <b>4-VP-PHI</b> or at the presence of $\text{Zn}^{2+}$ -----                                                             | S10  |
| Fig. S9. UV-vis spectra of $\text{Eu}^{3+}$ -metallopolymer with different metal ions and $\text{Zn}^{2+}$ titration-----                                          | S11  |
| Fig. S10. Fluorescence of $\text{Eu}^{3+}$ -metallopolymer induced by mixing with $\text{Zn}^{2+}$ ion and/or other cations-----                                   | S11  |
| Table S1. Photophysical properties of complex monomers at room temperature or 77K-----                                                                             | S11  |
| Table S2. GPC data for $\text{Poly}[(4\text{-VP-PHI})\text{-co-Eu-co-MMA}]$ -----                                                                                  | S12  |
| Table S3. PL data of $\text{Poly}[(4\text{-VP-PHI})\text{-co-Ln-co-MMA}]$ or $\text{Poly}[(4\text{-VP-PHI})\text{-co-Eu-co-MMA}]\text{@Zn}$ -----                  | S12  |
| Table S4. CIE coordinates of the $\text{Eu}^{3+}$ -metallopolymer with different excitation wavelength-----                                                        | S12  |
| Table S5. CIE coordinates of the <b>4-VP-PHI</b> at the presence of different metal ions-----                                                                      | S13  |
| Table S6. DFT calculation results for <b>4-VP-PHI</b> -----                                                                                                        | S13  |
| Table S7. CIE coordinates of the $\text{Eu}^{3+}$ -metallopolymer at the presence of different metal ions-----                                                     | S14  |

## Materials and Methods

High performance liquid chromatography (HPLC)-grade tetrahydrofuran (THF) or acetonitrile (MeCN) was purchased from Fisher Scientific and purified over solvent columns. Other solvents were used as received from Sigma Aldrich and stored over 3 Å activated molecule sieves. Azobis(isobutyronitrile) (AIBN) was purified by recrystallization twice from absolute MeOH prior to use. Other chemicals were commercial products of reagent grade and were used without further purification. (1,3-bis(4,4,4-trifluoro-1,3-dioxobutyl)phenyl) (H<sub>2</sub>BTP), the series of bis( $\beta$ -diketonate) tetrahydrate Ln<sup>3+</sup>-complex precursors [Ln<sub>2</sub>(BTP)<sub>3</sub>(H<sub>2</sub>O)<sub>4</sub>] (Ln = La, Eu or Gd), 2-(pyridin-2-yl)-5-(4-vinylphenyl)pyridine (4-VP-BPY) were synthesized according to well-established procedures from the literatures,<sup>1,2</sup> respectively. All manipulations of air and water sensitive compounds were carried out under dry N<sub>2</sub> using the standard Schlenk line techniques.

Elemental analyses were performed on a Perkin-Elmer 240C elemental analyzer. Infrared spectra were recorded on a Nicolet Magna-IR 550 spectrophotometer in the region 4000-600 cm<sup>-1</sup> using KBr pellets. <sup>1</sup>H NMR spectra were recorded on a Bruker Plus 400 spectrometer with SiMe<sub>4</sub> as the internal standard in CDCl<sub>3</sub> and/or DMSO- $\delta_6$  at room temperature. Electronic absorption spectra in the UV/Visible region were recorded with a Shimadzu UV-3159 UV-Vis-NIR spectrophotometer. Emission and excitation spectra were collected by a combined fluorescence lifetime and steady-state spectrometer (FLS-980, Edinburgh) with a 450 W Xe lamp. X-ray photoelectron spectroscopy (XPS) was measured using a Thermo ESCALAB250i X-ray photoelectron spectrometer. Excited-state decay times were obtained by the same spectrometer but with a  $\mu$ F900 Xe lamp. Thermogravimetric (TG) analyses were carried out on a NETZSCH TG 209 instrument under flowing nitrogen by heating the samples from 25 to 800 °C. MS study was

performed on a Waters ZQ2000 mass spectrometer using MeOH as solvent. The luminescent absolute overall quantum yield in solid state was determined by the same spectrometer using a 450 W Xe lamp and an integrating sphere. Gel permeation chromatography (GPC) analyses of the polymers were performed using a Waters 1525 binary pump coupled to a Waters 2414 refractive index detector with HPLC THF as the eluant on American Polymer Standard 10  $\mu\text{m}$  particle size, linear mixed bed packing columns. The GPC was calibrated using polystyrene standards. The Commission International de l'Eclairage (CIE) coordinate of each sample were calculated on the basis of the international CIE standards.

### **Electronic structure calculations**

The ground state ( $S_0$ ) properties of the small-molecule organic probe **4-VP-PHI** and its different metal ion ( $\text{Cd}^{2+}/\text{Zn}^{2+}$ ) complexes were calculated by DFT (density function theory) and TD-DFT (time-dependent DFT) of Gaussian 09 package in gas phase using the Becke's three parameterized Lee-Yang-Parr (B3LYP)<sup>3</sup> exchange functional with the 6-31G (d,p)<sup>4</sup> basis set for nonmetallic elements and LANL2DZ<sup>5</sup> basis set for metallic elements. The electronic density diagrams of molecular orbits were obtained with the GaussianView 6.0 software. Orbital composition was analyzed through Multiwfn<sup>6</sup> software.

### **Absorbance and fluorescence of 4-VP-PHI or $\text{Eu}^{3+}$ -metallopolymer with different cationic metal ions**

The organic small-molecule dye **4-VP-PHI** or  $\text{Eu}^{3+}$ -metallopolymer **Poly[(4-VP-PHI)-co-Eu-co-MMA]** was dissolved in MeCN- $\text{H}_2\text{O}$  mixed (9:1, v/v) solvent to afford the stock solution with a concentration of  $1 \times 10^{-3}$  M or 5 mg/ml. The solutions containing different inorganic chloride salts ( $\text{Na}^+$ ,  $\text{K}^+$ ,  $\text{Li}^+$ ,  $\text{Ni}^{2+}$ ,  $\text{Mg}^{2+}$ ,  $\text{Sn}^{2+}$ ,  $\text{Ca}^{2+}$ ,  $\text{Hg}^{2+}$ ,  $\text{Mn}^{2+}$ ,  $\text{Cd}^{2+}$ ,  $\text{Cr}^{2+}$ ,  $\text{Al}^{3+}$ ,  $\text{Zn}^{2+}$ ) with a stipulated

concentration of  $1 \times 10^{-3}$  M in a MeCN-H<sub>2</sub>O mixed (9:1, v/v) solvent were also prepared, respectively. During the experiments, the 40  $\mu$ L stock solution ( $1 \times 10^{-3}$  M) and each of the 40  $\mu$ L cationic metal ion solutions ( $1 \times 10^{-3}$  M) and 3 mL MeCN-H<sub>2</sub>O mixed (9:1, v/v) solvent were placed in a quartz cell (10.0 mm wide), and then MeCN-H<sub>2</sub>O mixed (9:1, v/v) solvent was further supplemented to a constant volume of 4 mL. Spectral data were recorded after 10 min at room temperature for equilibrating each addition. The UV-visible absorption spectrum was recorded in the wavelength range of 200-600 nm, and the fluorescence spectrum was recorded from 350 nm to 650 nm with excitation at 320 nm.

#### **Absorbance and fluorescence titrations of 4-VP-PHI or Eu<sup>3+</sup>-metallopolymer with Zn<sup>2+</sup> ion**

A series of solutions having the 40  $\mu$ L stock solution of **4-VP-PHI** or Eu<sup>3+</sup>-metallopolymer **Poly[(4-VP-PHI)-co- Eu-co-MMA]** in MeCN-H<sub>2</sub>O (9:1, v/v) ( $1 \times 10^{-3}$  M or 5 mg/ml) and ZnCl<sub>2</sub> ( $1 \times 10^{-3}$  M) in MeCN-H<sub>2</sub>O (9:1, v/v) were obtained in such a manner that the volume (4 mL) supplemented with MeCN-H<sub>2</sub>O (9:1, v/v) was kept constant. The amount of the ZnCl<sub>2</sub> ( $1 \times 10^{-3}$  M) in MeCN-H<sub>2</sub>O (9:1, v/v) was taken through adjusting the final concentrations of the Zn<sup>2+</sup> ion in the range of  $0-1.79 \times 10^{-8}$  M or  $0-1.45 \times 10^{-8}$  for **4-VP-PHI** and **Poly[(4-VP-PHI)-co-Eu-co-MMA]** respectively. The mixed solutions were blended for 10 min at room temperature, and both the UV-visible absorption and the fluorescence spectra were well recorded as the above-mentioned.

#### **Competition experiments**

Eu<sup>3+</sup>-metallopolymer **Poly[(4-VP-PHI)-co- Eu-co-MMA]** was dissolved in MeCN-H<sub>2</sub>O (9:1, v/v) to afford the stock solution with a concentration of 5 mg/ml. The solutions containing Zn<sup>2+</sup> ion and one of the other different inorganic chloride salts (Na<sup>+</sup>, K<sup>+</sup>, Li<sup>+</sup>, Ni<sup>2+</sup>, Mg<sup>2+</sup>, Sn<sup>2+</sup>, Ca<sup>2+</sup>, Hg<sup>2+</sup>, Mn<sup>2+</sup>, Cd<sup>2+</sup>, Cr<sup>2+</sup>, Al<sup>3+</sup>, Zn<sup>2+</sup>) with the similarly stipulated concentration of  $1 \times 10^{-3}$  M in a MeCN-

H<sub>2</sub>O-mixed (9:1, v/v) solvent were prepared, respectively. During the experiments, the 40  $\mu$ L stock solution ( $1 \times 10^{-3}$  M) and each of the 40  $\mu$ L containing Zn<sup>2+</sup> and metal ion solutions ( $1 \times 10^{-3}$  M) were placed in a quartz cell (10.0 mm wide), and then MeCN-H<sub>2</sub>O (9:1, v/v) was further supplemented to a constant volume of 4 mL. The mixed solutions were blended for 10 min at room temperature, and the fluorescence spectra were well recorded as the above-mentioned.

#### **Calculation of the Stern–Volmer constant ( $K_{sv}$ ) and limit of detection (LOD).**

The extent of fluorescence quenching was calculated using the Stern–Volmer equation below<sup>7</sup>:

$$\frac{I_0}{I} = 1 + K_{sv} \times [Z_n^{2+}] \quad (1)$$

where  $K_{sv}$  represents the Stern–Volmer quenching constant, and  $I_0$  and  $I$  respectively indicate the fluorescence intensities in the absence and presence of Zn<sup>2+</sup> ions at various concentrations.

The limit of detection (LOD) was calculated using equation below<sup>8</sup>:

$$LOD = \frac{3\sigma}{K_{sv}} \quad (2)$$

where  $\sigma$  represent the standard deviation (for ten measurements,  $n = 10$ ).

#### **Synthesis of 1,3-bis(4,4,4-trifluoro-1,3-dioxobutyl)phenyl (H<sub>2</sub>BTP)**

A mixture of sodium ethylate (1.36 g, 20 mmol) and ethyl trifluoroacetate (2.84 g, 20 mmol) in 40 mL dry THF (tetrahydrofuran) was stirred for 10 min under nitrogen atmosphere, followed by the addition of 1,3-Diacetylbenzene (1.36 g, 8.4 mmol), the solution was further stirred at room temperature for 24 h. Finally, the resulting mixture was poured into 100 mL ice water and acidified to pH 2–3 using hydrochloric acid (2 M), the

resulting white precipitate was filtered, dried in vacuum, and was purified from recrystallization in isopropanol. Yield 2.08 g (70%). Anal. Calcd for  $C_{14}H_8F_6O_4$ : C, 47.47; H, 2.28. Found: C, 47.42; H, 2.33. IR (KBr,  $cm^{-1}$ ): 3434 (w), 3125 (w), 1593 (s), 1265 (s), 1202 (s), 1156 (s), 1081 (s), 929 (m), 786 (m), 721 (w), 708 (w), 677 (w), 627 (m), 579 (m).  $^1H$ NMR ( $CDCl_3$ , 400 MHz):  $\delta$  (ppm) 8.50 (s, 1H, -Ph), 8.17 (d, 2H, -Ph), 7.70 (t, 1H, -Ph), 6.64 (s, 2H, -CH).

### **Synthesis of 2-(pyridin-2-yl)-5-(4-vinylphenyl)pyridine (4-VP-BPY)**

To a stirred solution of 5-Br-2,2'-bpy (1.40 g, 6 mmol), 4-vinylphenylboronic acid (0.89 g, 6 mmol), and  $Pd(PPh_3)_4$  (0.69 g of 6 mmol) in 20 ml toluene in three-necked round-bottom flask equipped with a condenser, an addition funnel, and a magnetic stirrer. degassed aqueous solution of  $Na_2CO_3$  (2 M, 6 mL) was added. The resulting mixture was further refluxed at  $90^\circ C$  for 48 h. After cooling down to room temperature, the mixture was extracted using  $CH_2Cl_2$  ( $3 \times 30$  mL) and dried over  $MgSO_4$ . Then, the organic layer was poured into n-hexane (50 mL). The precipitate was further purified through silica column chromatography by using ethyl acetate and n-hexane (v/v, 1/3) as the eluent to give a white powder product. Yield 1.33 g (86%). Anal. Calcd for  $C_{18}H_{14}N_2$ : C, 83.69; H, 5.46. Found: C, 83.56; H, 5.55. FT-IR (KBr,  $cm^{-1}$ ): 3461 (w), 3152 (w), 1961 (w), 1912 (w), 1810 (w), 1631 (s), 1591 (s), 1513 (m), 1461 (s), 1441 (vs), 1410 (m), 1372 (m), 1273 (w), 1241 (w), 1171 (s), 1122 (s), 1091 (w), 1072 (w), 1041 (w), 1031 (w), 988 (s), 931 (w), 902 (m), 836 (s), 795 (s), 751 (s), 722 (s), 695 (s), 647 (w), 634 (w), 618 (w), 587 (w), 541 (s), 516 (w), 446 (w).  $^1H$ NMR (400MHz,  $CDCl_3$ ):  $\delta$  (ppm) 8.96 (d, 1H, -Py), 8.73 (d, 1H, -Py), 8.48 (q, 2H, -Py), 8.06 (q, 1H, -Py), 7.87 (t, 1H, -Py), 7.67 (d, 2H, -Ph), 7.57 (d, 2H, -Ph), 7.36 (m, 1H, -Py), 6.81 (q, 1H, -CH=),

5.86 (d, 1H, =CH<sub>2</sub>), 5.35 (d, 1H, =CH<sub>2</sub>).

**Synthesis of divinyl-functionalized complex monomers [Ln<sub>2</sub>(BTP)<sub>3</sub>(4-VP-BPY)<sub>2</sub>] (Ln = La, 1; Eu, 2 or Gd, 3)**

To a stirred suspension of [Ln<sub>2</sub>(BTP)<sub>3</sub>(H<sub>2</sub>O)<sub>4</sub>] (0.3 mmol; Ln = La, 0.422 g; Ln = Eu, 0.430 g; Ln = Gd, 0.433 g) in absolute MeOH (10 mL), another solution of **4-VP-BPY** (0.155 g, 0.6 mmol) in absolute EtOH (10 mL) was added, and the reaction mixture was refluxed for 4 h under an N<sub>2</sub> atmosphere. After cooling to room temperature, each of the resultant clear solution was filtered and left to stand at room temperature for several days to give pale-yellow polycrystalline products, respectively.

For complex monomer [La<sub>2</sub>(BTP)<sub>3</sub>(4-VP-BPY)<sub>2</sub>]: Yield: 0.339 g, 61%. Anal. Calcd for C<sub>78</sub>H<sub>46</sub>F<sub>18</sub>O<sub>12</sub>N<sub>4</sub>La<sub>2</sub>: C, 50.61; H, 2.50; N, 3.03%. Found: C, 50.65; H, 2.41; N, 3.09%. FT-IR (KBr, cm<sup>-1</sup>): 2383 (w), 1688 (w), 1619 (s), 1536 (m), 1463 (m), 1298 (s), 1188 (m), 1140 (vs), 1078 (m), 956 (w), 839 (w), 780 (s), 738 (w), 694 (m), 635 (s). <sup>1</sup>H NMR (400 MHz, DMSO-*d*<sub>6</sub>): δ (ppm) 9.06 (d, 2H, -Py), 8.73 (d, 2H, -Py), 8.47 (m, 6H, -Py), 8.29 (q, 2H, -Py), 7.98 (m, 2H, -Py), 7.83 (d, 4H, -Ph), 7.54 (m, 14H, -Ph), 7.21 (t, 2H, -Ph), 6.82 (q, 2H, -CH=C), 6.14 (s, 3H, =CH-), 5.98 (d, 2H, =CH<sub>2</sub>), 5.76 (s, 3H, =CH-), 5.35 (d, 2H, =CH<sub>2</sub>). MS (MeOH, *m/z*): 1873.64, [M+Na]<sup>+</sup>.

For complex monomer [Eu<sub>2</sub>(BTP)<sub>3</sub>(4-VP-BPY)<sub>2</sub>]: Yield: 0.332 g, 59%. Anal. Calcd for C<sub>78</sub>H<sub>46</sub>F<sub>18</sub>O<sub>12</sub>N<sub>4</sub>Eu<sub>2</sub>: C, 49.91; H, 2.47; N, 2.98%. Found: C, 49.83; H, 2.51; N, 3.03%. FT-IR (KBr, cm<sup>-1</sup>): 2383 (w), 1689 (w), 1619 (s), 1536 (m), 1464 (m), 1299 (s), 1188 (m), 1140 (vs), 1079 (m), 956 (w), 837 (w), 780 (s), 738 (w), 694 (m), 635 (s). MS (MeOH, *m/z*): 1899.56, [M+Na]<sup>+</sup>.

For complex monomer [Gd<sub>2</sub>(BTP)<sub>3</sub>(4-VP-BPY)<sub>2</sub>]: Yield: 0.362 g, 64%. Anal. Calcd for C<sub>78</sub>H<sub>46</sub>F<sub>18</sub>O<sub>12</sub>N<sub>4</sub>Gd<sub>2</sub>: C, 49.63; H, 2.46; N, 2.97%. Found: C, 49.56; H, 2.51; N, 2.91%. FT-IR (KBr,

cm<sup>-1</sup>): 2383 (w), 1689 (w), 1618 (s), 1532 (m), 1471 (m), 1290 (s), 1185 (m), 1350 (vs), 1072 (m), 950 (w), 835 (w), 779 (s), 738 (w), 694 (m), 638 (s). MS (MeOH, *m/z*): 1913.48, [M+Na]<sup>+</sup>.

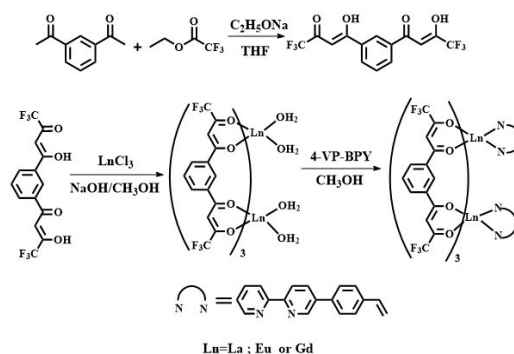

**Scheme S1.** Synthesis procedure for [Ln<sub>2</sub>(BTP)<sub>3</sub>(4-VP-BPY)<sub>2</sub>] (Ln = La, Eu or Gd)

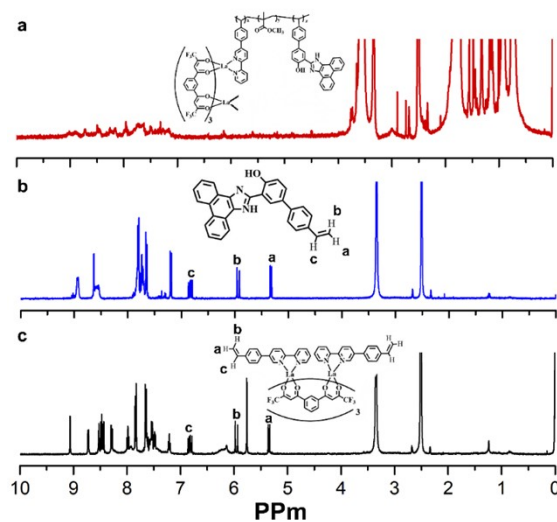

**Fig. S1.** The <sup>1</sup>H NMR spectra of 4-VP-PHI, La(BTP)<sub>3</sub>(4-VP-BPY)<sub>2</sub> and Poly[(4-VP-PHI)-co-La-co-MMA] in DMSO-*d*<sub>6</sub> at room temperature.

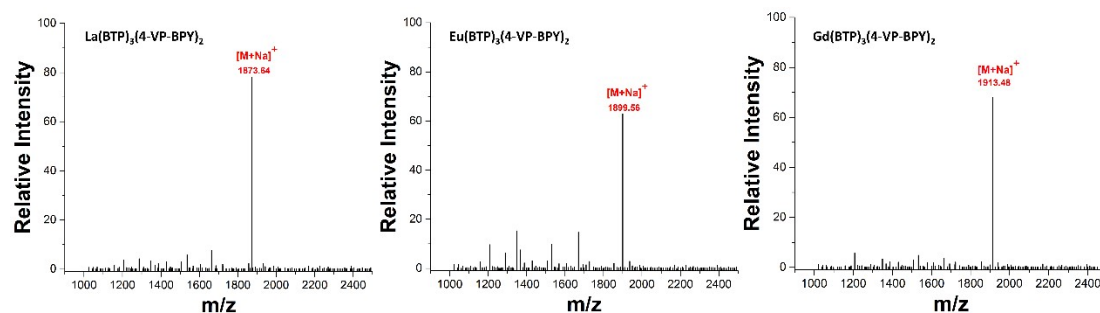

**Fig. S2.** Mass spectrum of Ln(BTP)<sub>3</sub>(4-VP-BPY)<sub>2</sub> (Ln = La, Eu or Gd).



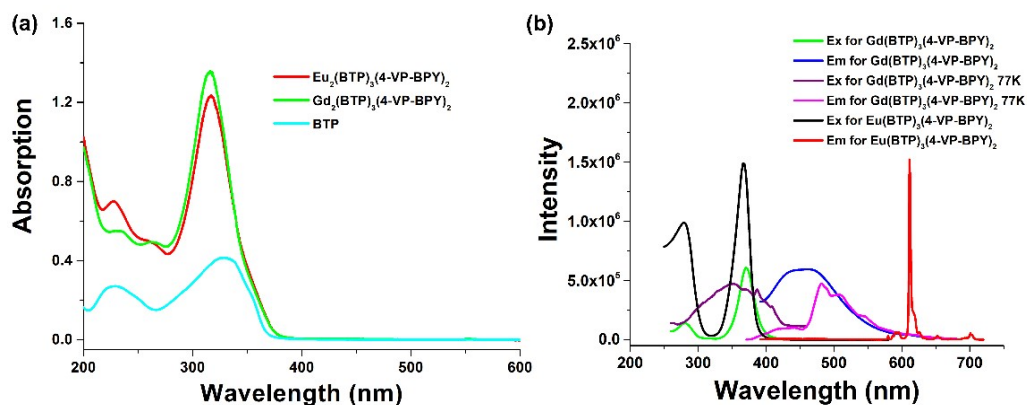

**Fig. S3.** (a) UV-visible absorption spectra of  $\text{Ln}(\text{BTP})_3(4\text{-VP-BPY})_2$  ( $\text{Ln} = \text{La}, \text{Eu}, \text{Gd}$ ) and BTP at room temperature; (b) Emission and Excitation spectra of  $\text{Gd}(\text{BTP})_3(4\text{-VP-BPY})_2$  at room temperature and 77 K.

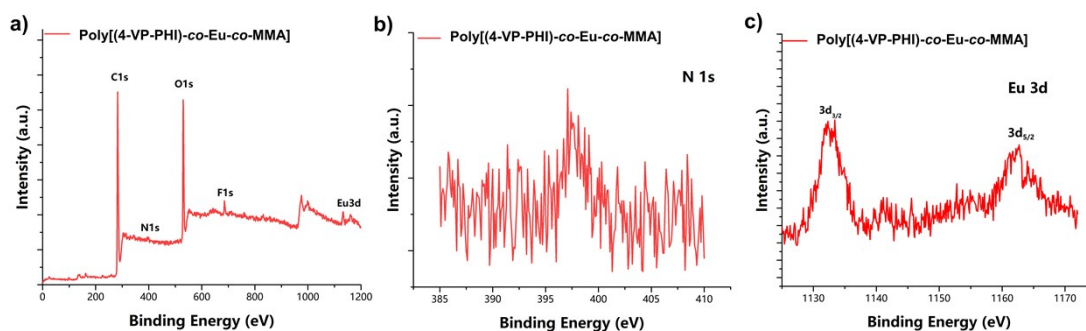

**Fig. S4.** High resolution XPS patterns of **Poly[(4-VP-PHI)-co-Eu-co-MMA]**.

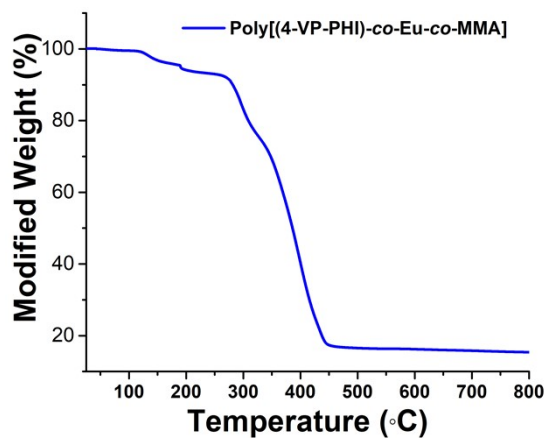

**Fig S5.** TGA curve of **Poly[(4-VP-PHI)-co-Eu-co-MMA]**.

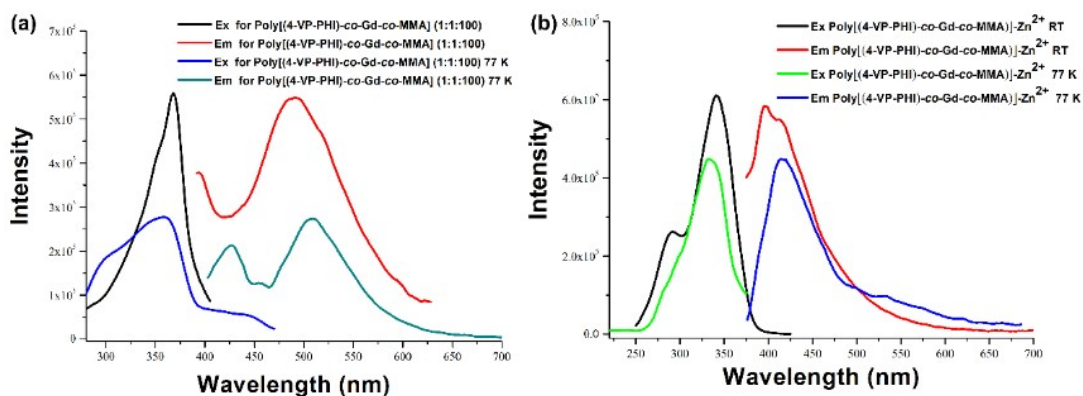

**Fig S6.** Emission and Excitation spectra of **Poly[(4-VP-PHI)-co-Gd-co-MMA]** with or without  $Zn^{2+}$  at room temperature and 77 K.

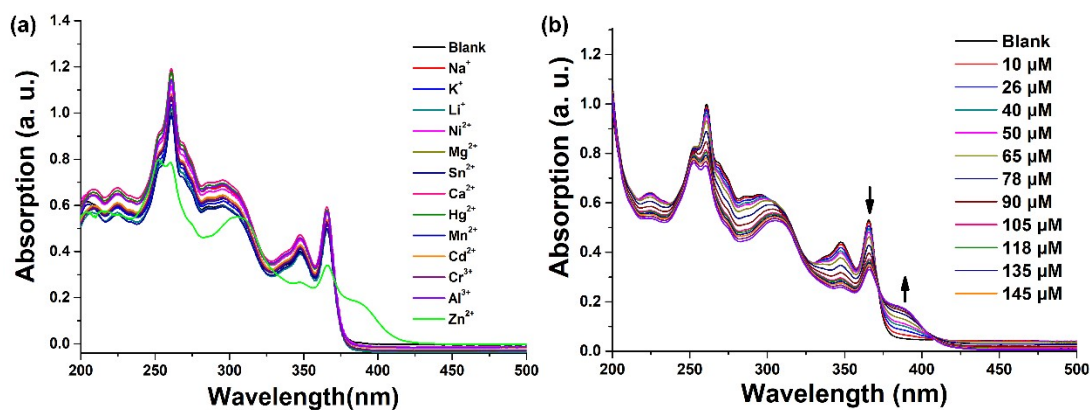

**Fig. S7.** (a) UV-vis spectra of **4-VP-PHI** with different metal ions and (b)  $Zn^{2+}$  titration.

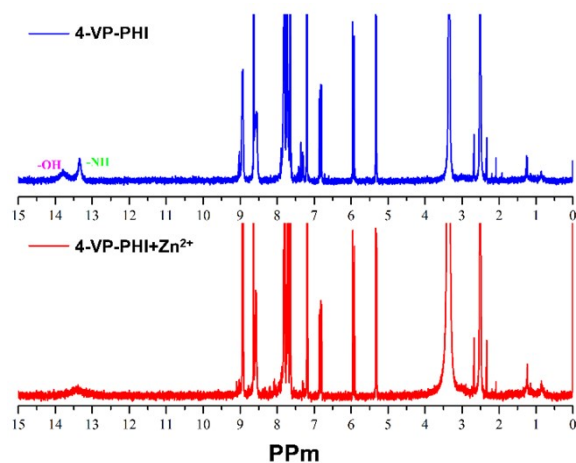

**Fig. S8.** The  $^1H$  NMR spectra of pure **4-VP-PHI** (up) and in the presence of  $Zn^{2+}$  (down) in  $DMSO-d_6$  at room temperature.

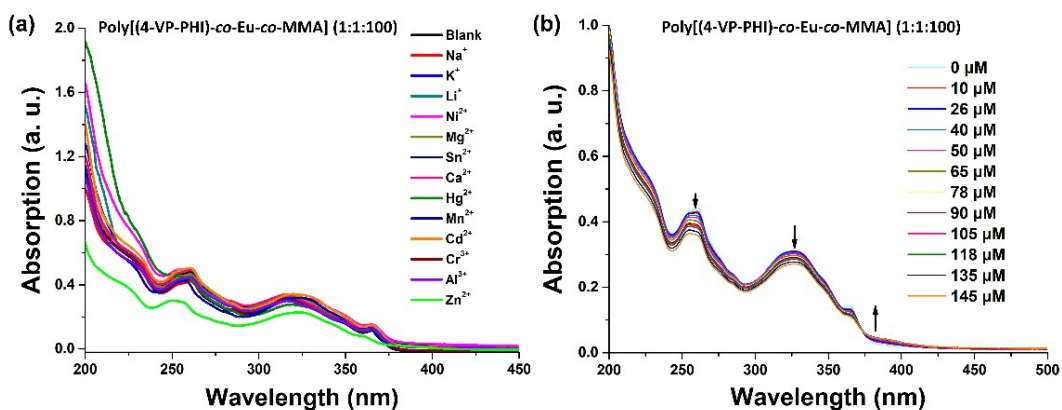

Fig. S9. (a) UV-vis spectra of Poly[(4-VP-PHI)-co-Eu-co-MMA] with different metal ions and (b) Zn<sup>2+</sup> titration.

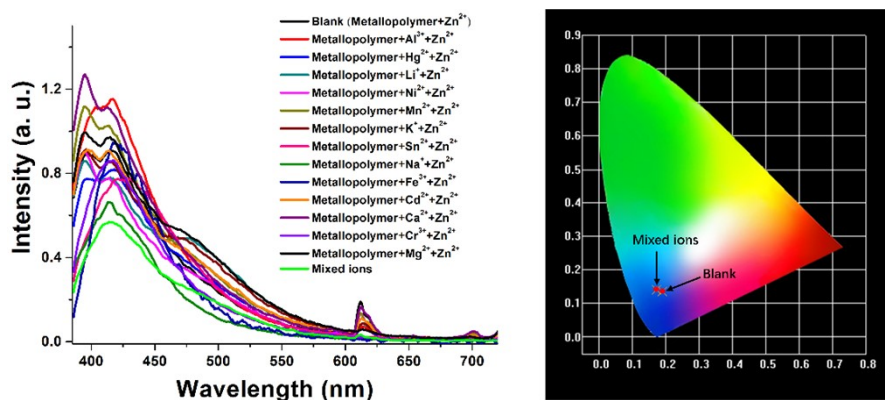

Fig S10. Changes in the fluorescence of Eu<sup>3+</sup>-metallopolymer induced by mixing with Zn<sup>2+</sup> ion and/or other different cationic metal ions at  $\lambda_{ex} = 365$  nm.

Table S1. Photophysical properties of complex monomers in absolute MeCN solution at room temperature or 77K.

| Compound                                                               | Absorption<br>$\lambda_{ab}$ (nm) | Excitation<br>$\lambda_{ex}$ (nm) | Emission<br>$\lambda_{em}$ (nm) ( $\tau$ , $\Phi$ )           |
|------------------------------------------------------------------------|-----------------------------------|-----------------------------------|---------------------------------------------------------------|
| [Eu <sub>2</sub> (BTP) <sub>3</sub> (4- <i>vp</i> -bpy) <sub>2</sub> ] | 228, 318                          | 280, 366                          | 580, 591, 611 (474.24 $\mu$ s), 652, 701<br>( $\Phi$ : 38.4%) |
| [Gd <sub>2</sub> (BTP) <sub>3</sub> (4- <i>vp</i> -bpy) <sub>2</sub> ] | 238, 264, 317                     | 282, 370<br>353 (77K)             | 462<br>439, 482 (4.71 $\mu$ s, 77K), 507                      |
| 4-VP-PHI                                                               | 224, 260, 298, 347,<br>364        | 303, 362                          | 493 ( $\Phi$ : 9.4%)                                          |

**Table S2.** GPC data for **Poly[(4-VP-PHI)-co-Eu-co-MMA]**.

| Polymer                       | <i>M<sub>n</sub></i> | <i>M<sub>w</sub></i> | <i>M<sub>z</sub></i> | <i>M<sub>z</sub>+1</i> | PDI  |
|-------------------------------|----------------------|----------------------|----------------------|------------------------|------|
| Poly[(4-VP-PHI)-co-Eu-co-MMA] | 8898                 | 14242                | 20978                | 27548                  | 1.60 |

**Table S3.** Photoluminescent properties of the PMMA-supported **Poly[(4-VP-PHI)-co- Ln-co-MMA]** (Ln = Eu or Gd) or **Poly[(4-VP-PHI)-co-Eu-co-MMA] @Zn** at RT or 77 K.

| Compound                         | Excitation        | Emission                                                       |
|----------------------------------|-------------------|----------------------------------------------------------------|
|                                  | $\lambda_{ex}/nm$ | $\lambda_{em}/nm$ ( $\tau$ , $\Phi$ )                          |
| Poly[(4-VP-PHI)-co-Eu-co-MMA]    | 300 (sh), 351     | 393,489, 591, 612 (969 $\mu$ s), 651 and 704 ( $\Phi$ : 15.2%) |
| Poly[(4-VP-PHI)-co-Gd-co-MMA]    | 368               | 491                                                            |
|                                  | 359               | 508 (4.36 $\mu$ s, 77 K)                                       |
| Poly[(4-VP-PHI)-co-Gd-co-MMA]@Zn | 341               | 397                                                            |
|                                  | 334               | 415 (5.19 $\mu$ s, 77 K)                                       |

**Table S4.** Color-integration results of the metallopolymer **Poly[(4-VP-PHI)-co-Eu-co-MMA]** with different excitation in MeCN solution at room temperature.

| Metallopolymer                | Excitation | CIE coordinates |
|-------------------------------|------------|-----------------|
| Poly[(4-VP-PHI)-co-Eu-co-MMA] | 341        | (0.489, 0.316)  |
|                               | 351        | (0.432, 0.315)  |
|                               | 361        | (0.385, 0.314)  |
|                               | 365        | (0.311, 0.319)  |
|                               | 371        | (0.293, 0.329)  |
|                               | 381        | (0.356, 0.318)  |

**Table S5.** Color-integration results of **4-VP-PHI** at the presence of different metal ions at room temperature.

| compound         | Metal ion        | CIE coordinates |
|------------------|------------------|-----------------|
| <b>4-VP-PHI</b>  | Blank            | (0.204, 0.441)  |
|                  | Na <sup>+</sup>  | (0.209, 0.436)  |
|                  | K <sup>+</sup>   | (0.207, 0.440)  |
|                  | Li <sup>+</sup>  | (0.208, 0.427)  |
|                  | Ni <sup>2+</sup> | (0.199, 0.448)  |
|                  | Mg <sup>2+</sup> | (0.202, 0.451)  |
|                  | Sn <sup>2+</sup> | (0.202, 0.448)  |
|                  | Ca <sup>2+</sup> | (0.198, 0.446)  |
|                  | Hg <sup>2+</sup> | (0.205, 0.451)  |
|                  | Mn <sup>2+</sup> | (0.203, 0.453)  |
|                  | Cd <sup>2+</sup> | (0.201, 0.451)  |
|                  | Cr <sup>3+</sup> | (0.203, 0.456)  |
|                  | Al <sup>3+</sup> | (0.201, 0.455)  |
| Zn <sup>2+</sup> | (0.186, 0.330)   |                 |

**Table S6.** The HOMO and LUMO of the **4-VP-PHI**, **4-VP-PHI@Zn<sup>2+</sup>** based on optimized S<sub>0</sub> and S<sub>1</sub> Geometries.

| Complex                         | state                | Energy Level (eV)          |                            |                          |                          |                            |                            |                       |
|---------------------------------|----------------------|----------------------------|----------------------------|--------------------------|--------------------------|----------------------------|----------------------------|-----------------------|
|                                 |                      | <i>E</i> <sub>LUMO+2</sub> | <i>E</i> <sub>LUMO+1</sub> | <i>E</i> <sub>LUMO</sub> | <i>E</i> <sub>HOMO</sub> | <i>E</i> <sub>HOMO-1</sub> | <i>E</i> <sub>HOMO-2</sub> | <i>E</i> <sub>g</sub> |
| <b>4-VP-PHI</b>                 | <b>S<sub>1</sub></b> | -0.72                      | -1.20                      | -1.59                    | -4.97                    | -5.56                      | -5.89                      | 3.38                  |
| <b>4-VP-PHI@Zn<sup>2+</sup></b> | <b>S<sub>1</sub></b> | -1.19                      | -1.35                      | -1.58                    | -4.73                    | -5.03                      | -5.67                      | 3.14                  |

**Table S7.** Color-integration results of the metallopolymer **Poly[(4-VP-PHI)-co-Eu-co-MMA]** at the presence of different metal ions at room temperature.

| Metallopolymer                | Metal ion        | CIE coordinates |
|-------------------------------|------------------|-----------------|
| Poly[(4-VP-PHI)-co-Eu-co-MMA] | Na <sup>+</sup>  | (0.263, 0.296)  |
|                               | K <sup>+</sup>   | (0.269, 0.304)  |
|                               | Li <sup>+</sup>  | (0.211, 0.297)  |
|                               | Ni <sup>2+</sup> | (0.243, 0.296)  |
|                               | Mg <sup>2+</sup> | (0.236, 0.288)  |
|                               | Sn <sup>2+</sup> | (0.268, 0.284)  |
|                               | Ca <sup>2+</sup> | (0.199, 0.274)  |
|                               | Hg <sup>2+</sup> | (0.177, 0.279)  |
|                               | Mn <sup>2+</sup> | (0.173, 0.270)  |
|                               | Cd <sup>2+</sup> | (0.178, 0.301)  |
|                               | Cr <sup>3+</sup> | (0.210, 0.308)  |
|                               | Al <sup>3+</sup> | (0.257, 0.309)  |
| Zn <sup>2+</sup>              | (0.181, 0.116)   |                 |

## References

1. J. Shi, Y. Hou, W. Chu, X. Shi, H. Gu, B. Wang and Z. Sun, Crystal structure and highly luminescent properties studies of bis- $\beta$ -diketonate lanthanide complexes, *Inorg. Chem.*, 2013, **52**, 5013-5022.
2. E. K. Pefkianakis, N. P. Tzanetos and J. K. Kallitsis, Synthesis and characterization of a novel vinyl-2, 2'-bipyridine monomer and its homopolymeric/copolymeric metal complexes, *Chem. Mater.*, 2008, **20**, 6254-6262.
3. M. J. Frisch, G. W. Trucks, H. B. Schlegel, G. E. Scuseria, M. A. Robb, J. R. Cheeseman, G. Scalmani, V. Barone, B. Mennucci, G. A. Petersson, H. Nakatsuji, M. Caricato, X. Li, H. P. Hratchian, A. F. Izmaylov, J. Bloino, G. Zheng, J. L. Sonnenberg, M. Hada, M. Ehara, K. Toyota, R. Fukuda, J. Hasegawa, M. Ishida, T. Nakajima, Y. Honda, O. Kitao, H. Nakai, T. Vreven, J. J. A. Montgomery, J. E. Peralta, F. Ogliaro, M. Bearpark, J. J. Heyd, E. Brothers, K. N. Kudin, V. N.

- Staroverov, T. Keith, R. Kobayashi, J. Normand, K. Raghavachari, A. Rendell, J. C. Burant, S. S. Iyengar, J. Tomasi, M. Cossi, N. Rega, J. M. Millam, M. Klene, J. E. Knox, J. B. Cross, V. Bakken, C. Adamo, J. Jaramillo, R. Gomperts, R. E. Stratmann, O. Yazyev, A. J. Austin, R. Cammi, C. Pomelli, J. W. Ochterski, R. L. Martin, K. Morokuma, V. G. Zakrzewski, G. A. Voth, P. Salvador, J. J. Dannenberg, S. Dapprich, A. D. Daniels, O. Farkas, J. B. Foresman, J. V. Ortiz, J. Cioslowski and D. J. Fox, Gaussian 09, Revision C.01, Gaussian, Inc., Wallingford CT, **2010**.
4. J. E. Del Bene, W. B. Person and K. Szczepaniak, Properties of Hydrogen-Bonded Complexes Obtained from the B3LYP Functional with 6-31G (d, p) and 6-31+G (d, p) Basis Sets: Comparison with MP2/6-31+G (d, p) Results and Experimental Data, *J. Phys. Chem.*, 1995, **99**, 10705-10707.
  5. S. Sagdinc and H. Pir, Spectroscopic and DFT studies of flurbiprofen as dimer and its Cu (II) and Hg (II) complexes, *Spectrochim. Acta A Mol. Biomol. Spectrosc.*, 2009, **73**, 181-194.
  6. T. Lu and F. Chen, Multiwfn: a multifunctional wavefunction analyzer, *J. Comput. Chem.*, 2012, **33**, 580-592.
  7. D. Jiang, X. Yang, X. Zheng, L. Bo, T. Zhu, H. Chen, L. Zhang and S. Huang, Self-assembly of luminescent 12-metal Zn–Ln planar nanoclusters with sensing properties towards nitro explosives, *J. Mater. Chem. C*, 2018, **6**, 8513-8521.
  8. Qi, Y. Jin, N. Li, Z. Wang, K. Wang and Q. Zhang, A luminescent heterometallic metal–organic framework for the naked-eye discrimination of nitroaromatic explosives, *Chem. Commun.*, 2017, **53**, 10318-10321.
